# Supplementary material for: Direct dizinc displacement approach for efficient detection of Cu2+ in aqueous media: acetate versus phenolate bridging platforms
Source: Royal Society of Chemistry journal article supplement (doi:10.1039/b9nj00770a), 2010-01-01
Supplement: b9nj00770a.pdf [file b9nj00770a.pdf]

## Electronic Supplementary Information (ESI)

# Direct Dizinc Displacement Approach for Efficient Detection of $\text{Cu}^{2+}$ in Aqueous Media: Acetate versus Phenolate Bridging Platforms

**Snehadrinarayan Khatua, Jina Kang and David G. Churchill\***

*Molecular Logic Gate Laboratory, Department of Chemistry, Korea Advanced Institute of Science  
and Technology (KAIST), 373-1 Guseong-dong, Yuseong-gu, Daejeon, 305-701, Republic of Korea,*

*Fax: +82-42-350-2810, Tel: +82-42-350-2885; E-mail: [dchurchill@kaist.ac.kr](mailto:dchurchill@kaist.ac.kr)*

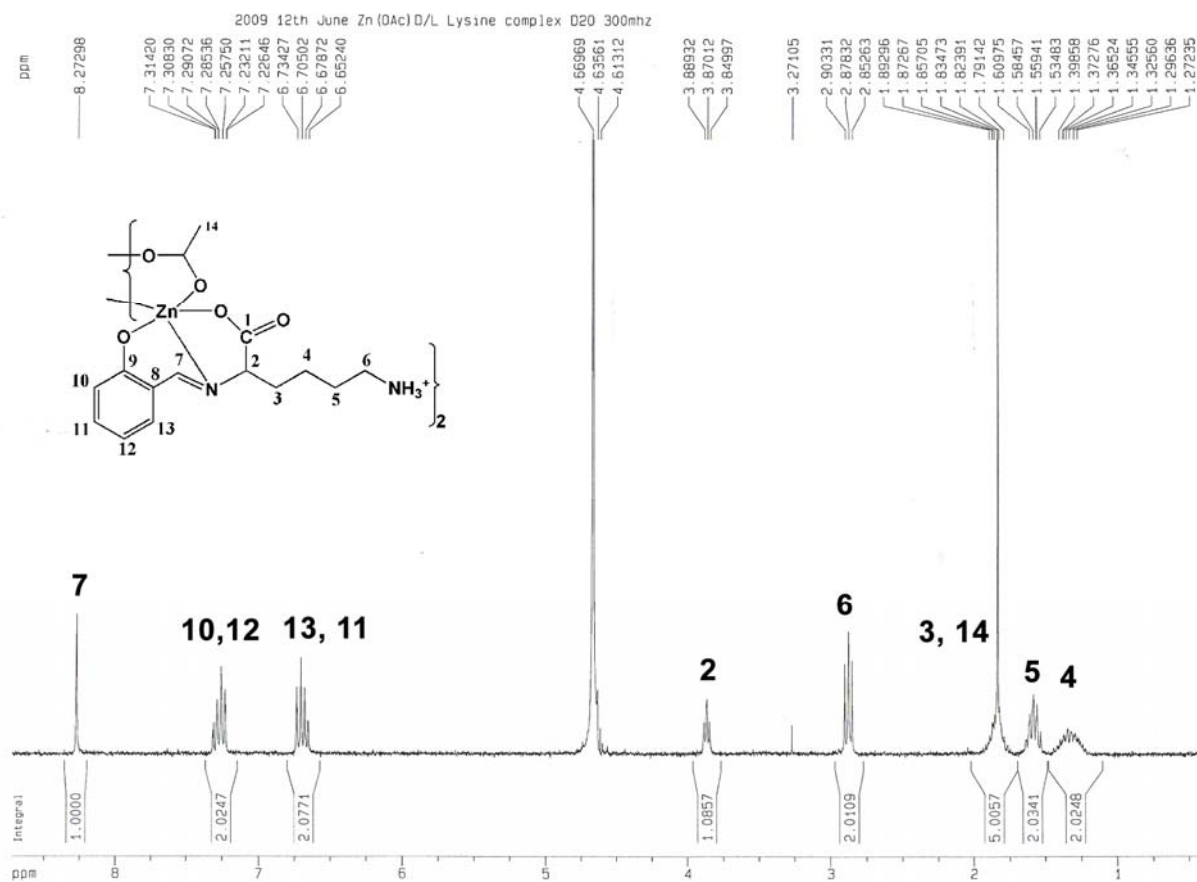

Figure S1.  $^1\text{H}$  NMR spectrum of compound **3** in  $\text{D}_2\text{O}$ .

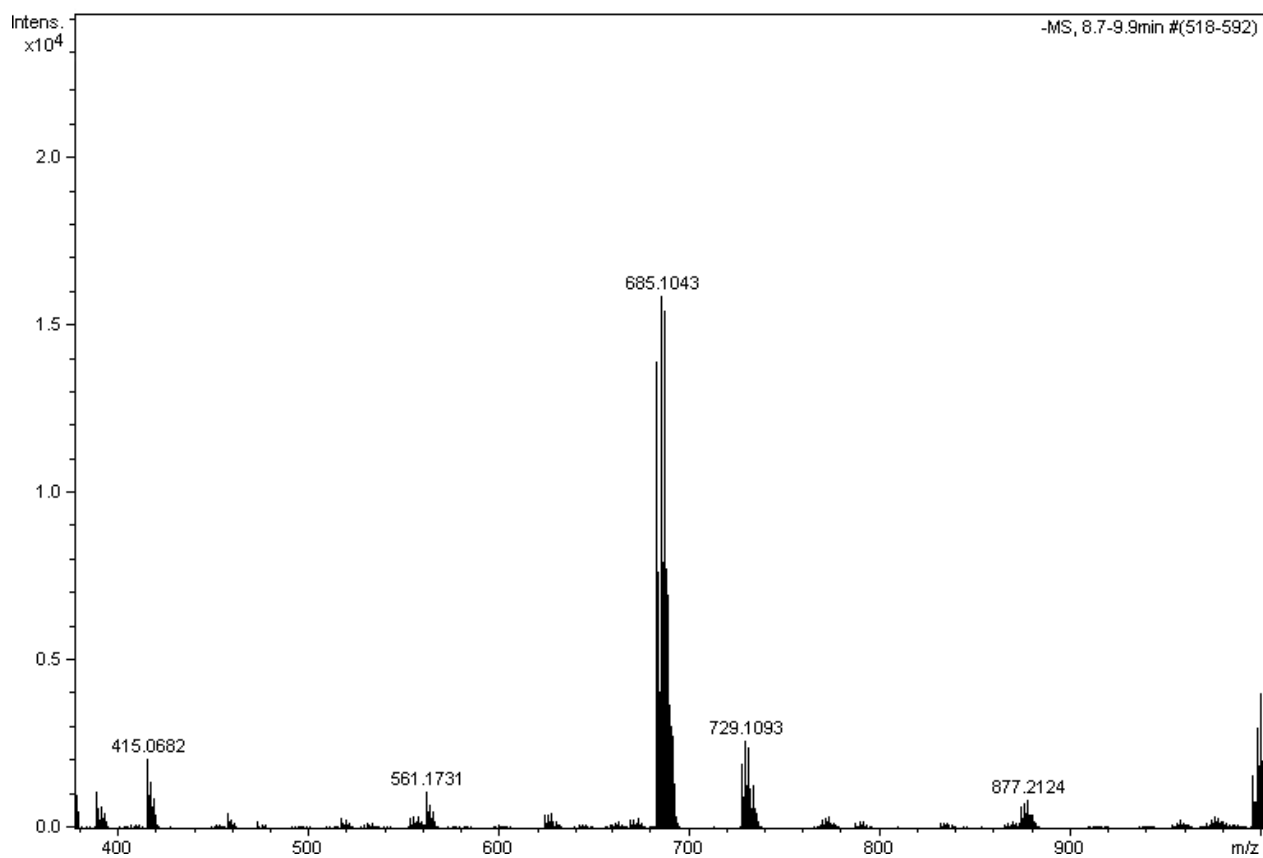

Figure S2. ESI mass spectrum of compound **3** in  $\text{H}_2\text{O}$  /  $\text{MeOH}$  (1:1) mixture.

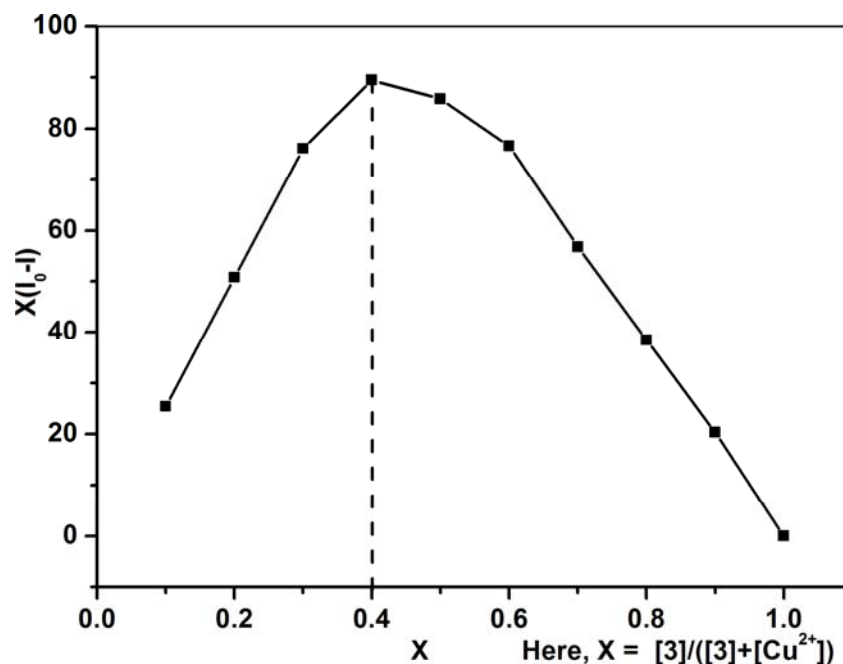

**Figure S3.** Job's plot for compound **3** and  $\text{Cu}^{2+}$  binding ( $\lambda_{\text{ex}}$  at 354 nm and  $\lambda_{\text{em}}$  at 452 nm) in an aqueous buffer solution (pH 7.4, 10 mM HEPES,  $\text{H}_2\text{O}$  :  $\text{MeOH}$ ; 9 : 1) at 25 °C by emission spectroscopy. In the plot, the value 0.4 supports a nearly 1:2 compound, **3**: $\text{Cu}^{2+}$  binding stoichiometry.

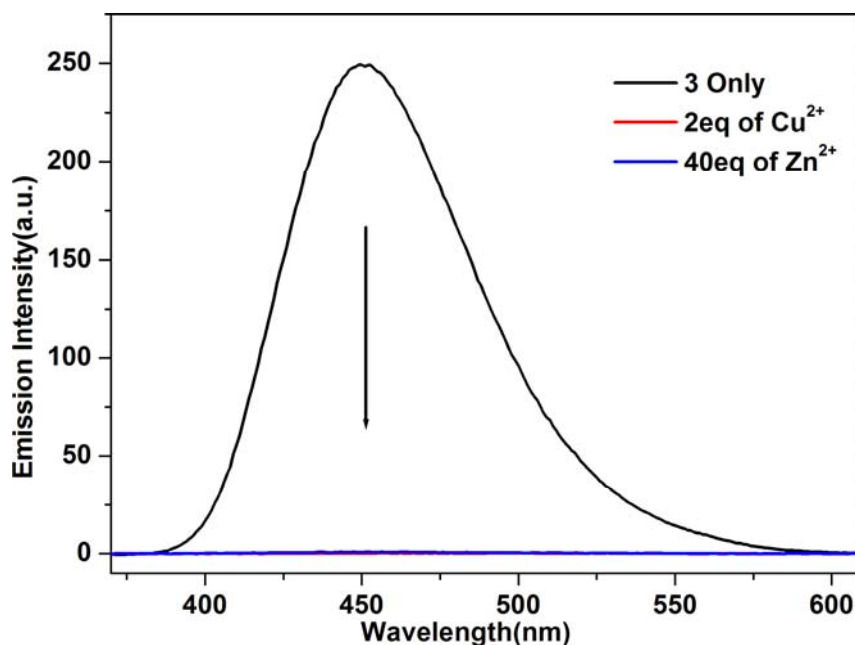

**Figure S4.** (a) Emission spectra of compound **3** (50  $\mu\text{M}$ ) in an aqueous buffer solution (pH 7.4, 0.01 M HEPES) with 2 equivalents of  $\text{Cu}^{2+}$  solution (100  $\mu\text{M}$ ) and 40 equivalents of  $\text{Zn}^{2+}$  solution to the mixture of **3** and  $\text{Cu}^{2+}$  ion.





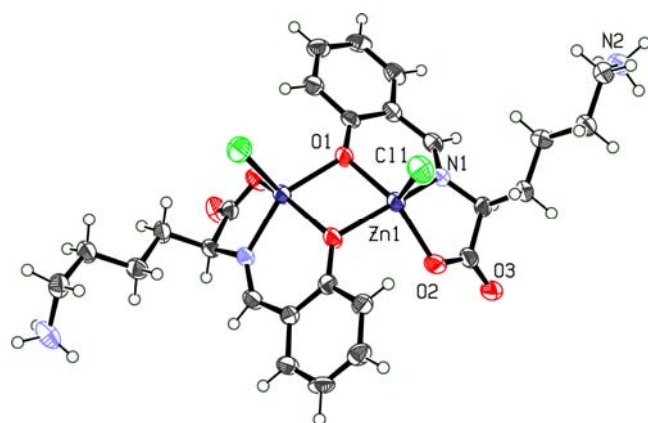

(a)

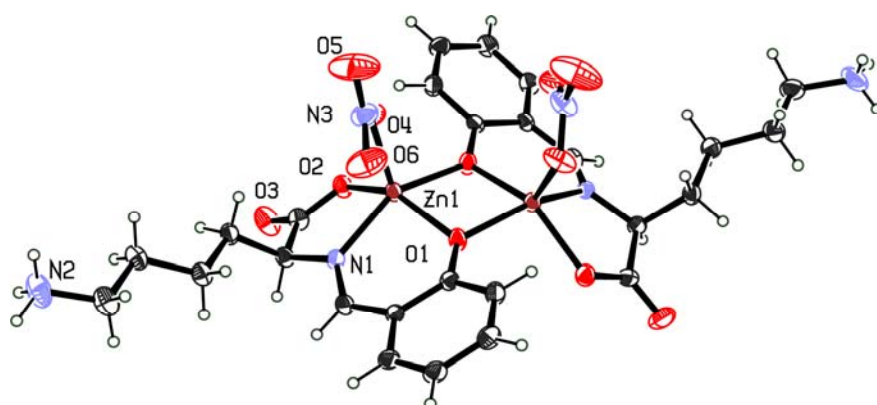

(b)

**Figure S9.** Crystal structure of (a) Compound **1**<sup>2</sup> and (b) **2**.<sup>1</sup> Thermal ellipsoids at 30 % probability. Solvent waters are omitted for clarity from the drawing.

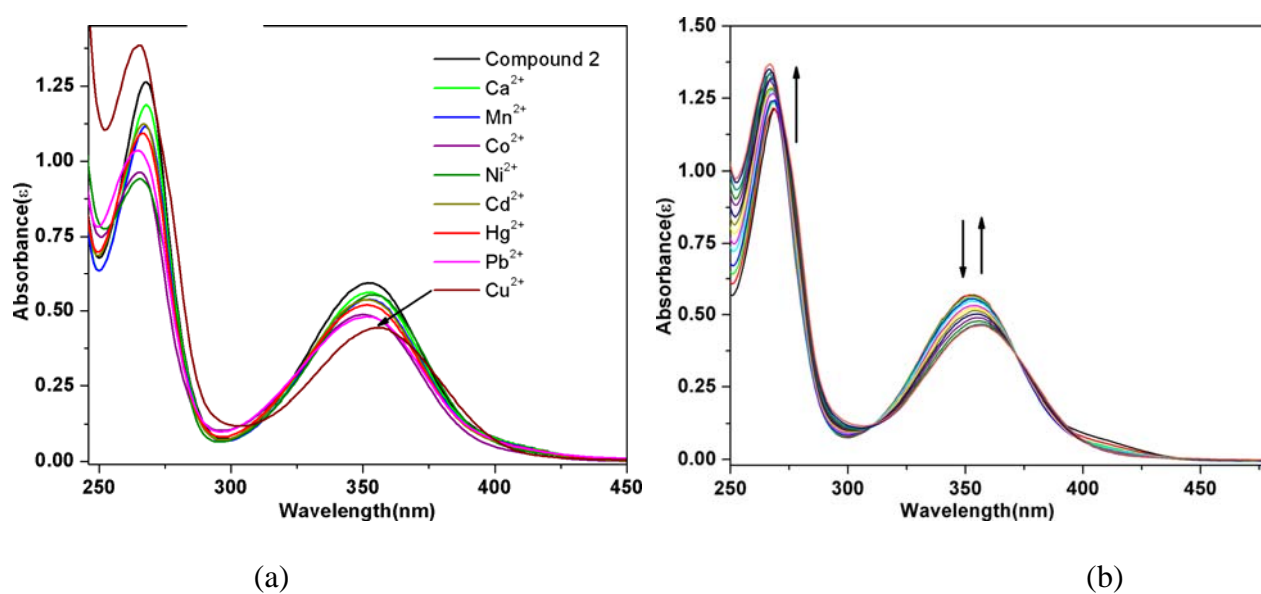

(a)

(b)

**Figure S10.** (a) UV-Vis spectra of **2** (50 μM) with different cations (100 μM) in aqueous buffer solution (pH 7.4, 0.01 M HEPES). (b) Absorbance titration of compound **2** (50 μM) in aqueous buffer solution (pH 7.4, 0.01 M HEPES) with an increasing amount of Cu<sup>2+</sup> titrant (100 μM).<sup>1</sup>

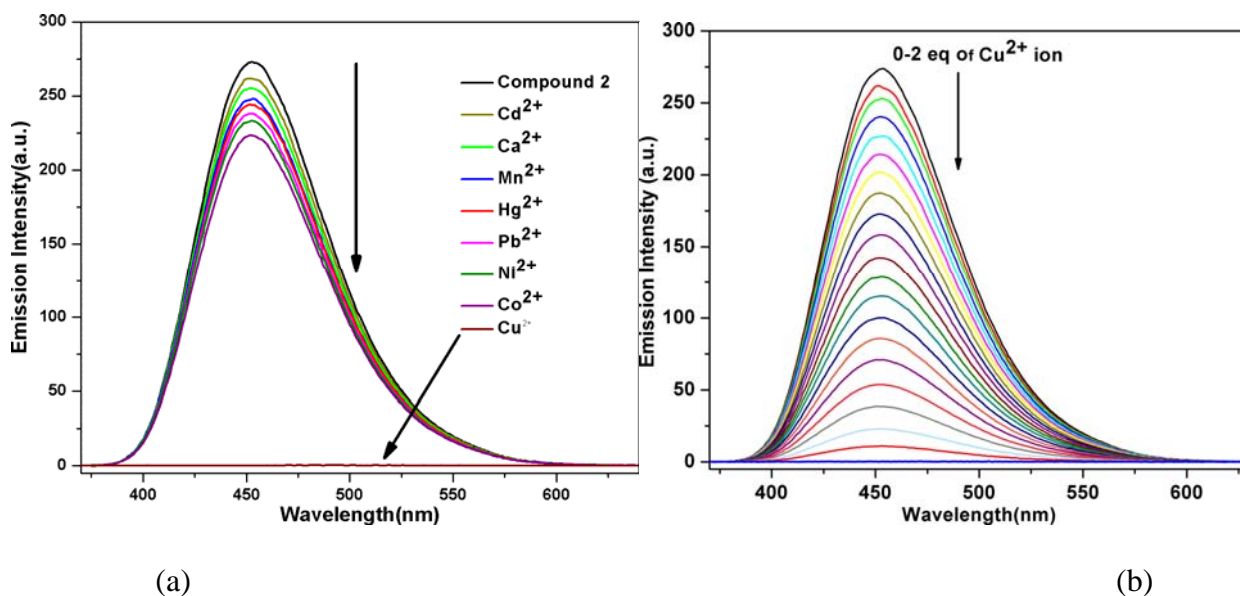

**Figure S11.** (a) Emission spectra of **2** (50  $\mu\text{M}$ ,  $\lambda_{\text{ex}} = 352 \text{ nm}$ ,  $\lambda_{\text{em}} = 452 \text{ nm}$ ) with different cations (each with a concentration of 100  $\mu\text{M}$ ). (b) Emission titration of **2** (50  $\mu\text{M}$ ) in aqueous buffer solution (pH 7.4, 0.01 M HEPES) with increasing amounts of  $\text{Cu}^{2+}$  solution (100  $\mu\text{M}$ ).<sup>1</sup>

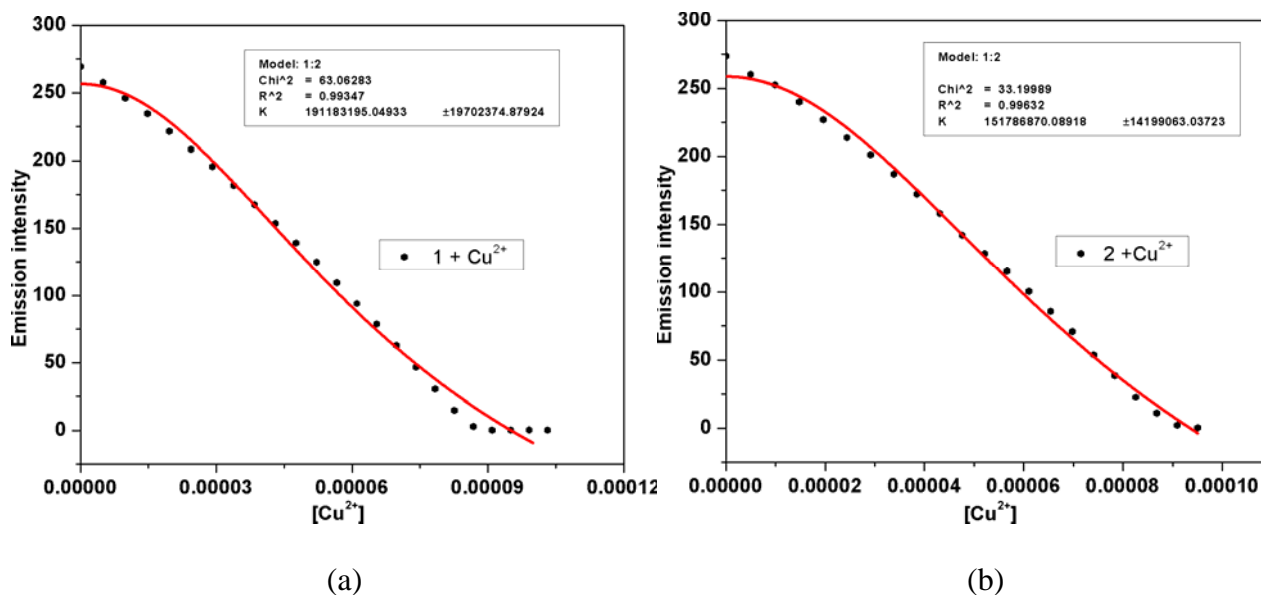

**Figure S12.** Non-linear curve fitting of copper binding from emission titration data. (a) Compound **1** and increasing amounts of  $\text{Cu}^{2+}$ ; (b) Compound **2** and increasing amounts of  $\text{Cu}^{2+}$ .<sup>1</sup>

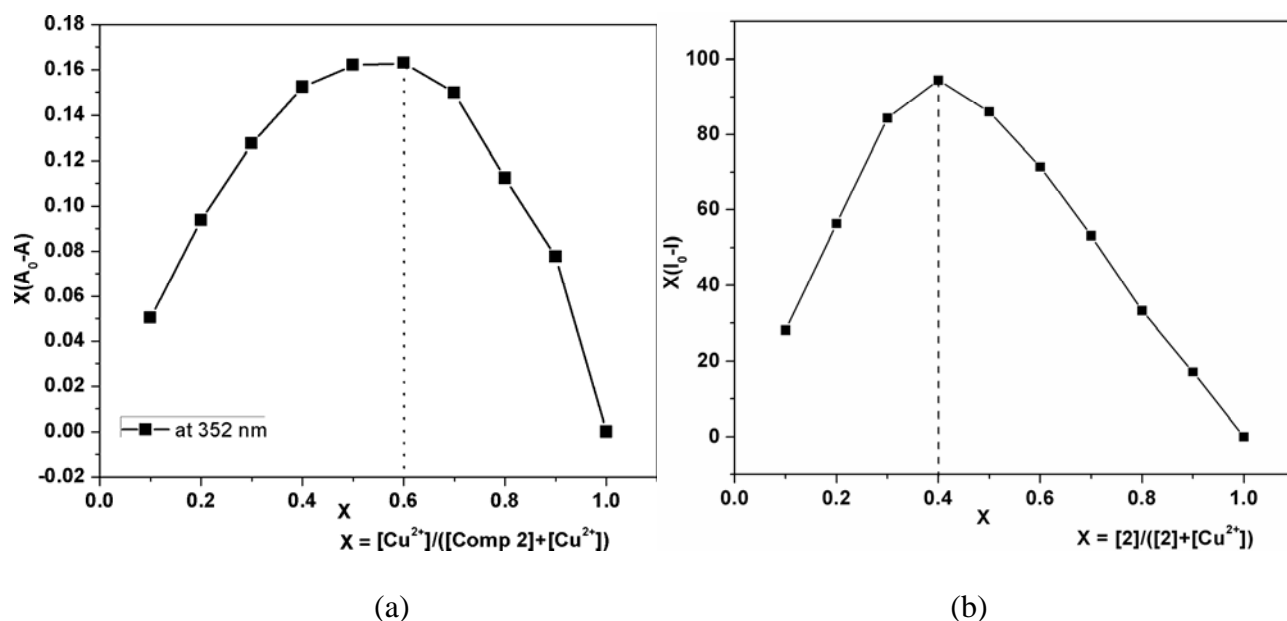

**Figure S13.** Job's plot for compound **2** and  $\text{Cu}^{2+}$  binding ( $\lambda_{\text{max}}$  at 352 nm) in an aqueous buffer solution (pH 7.4, 10 mM HEPES) at 25 °C by (a) by UV-vis spectroscopy (against a  $\text{Cu}^{2+}$  concentration; value of 0.6 suggests nearly 1 : 2 compound **2** :  $\text{Cu}^{2+}$  binding stoichiometry), and (b) by emission spectroscopy (plot against compound **2** concentration; value of 0.4 shows nearly a 1 : 2 compound **2** :  $\text{Cu}^{2+}$  binding stoichiometry).<sup>1</sup>

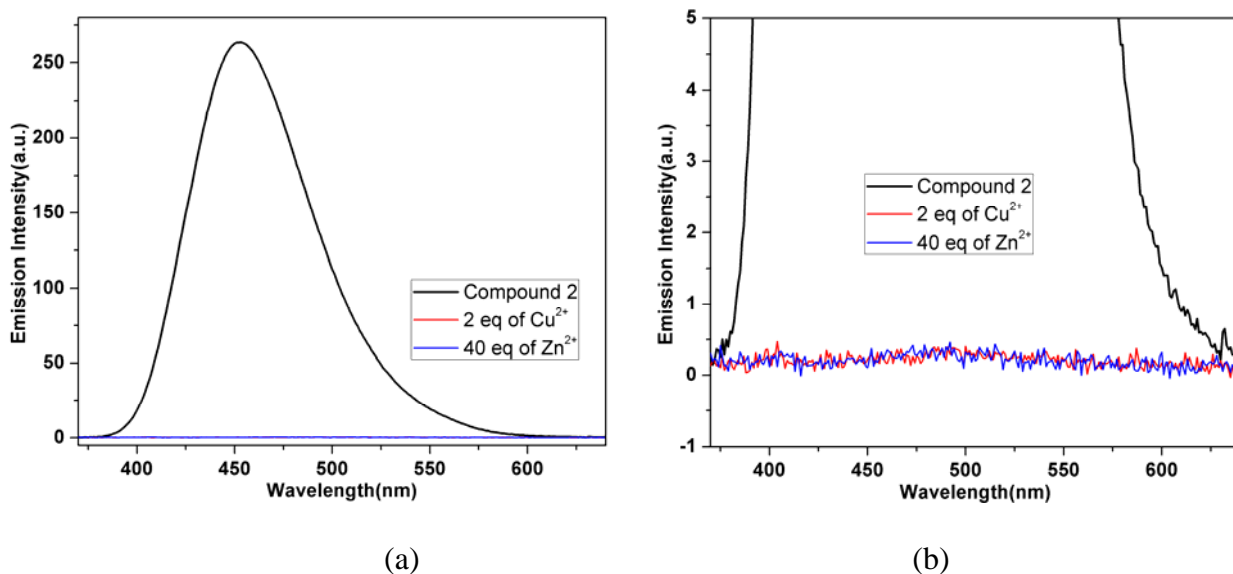

**Figure S14.** (a) Emission spectra of Compound **2** (50  $\mu\text{M}$ ) in an aqueous buffer solution (pH 7.4, 0.01 M HEPES) with 2 equivalents of  $\text{Cu}^{2+}$  (100  $\mu\text{M}$  solution) and 40 equivalents of  $\text{Zn}^{2+}$  (solution) to the mixture of **2** and  $\text{Cu}^{2+}$  ion. (b) Expanded spectra.<sup>1</sup>



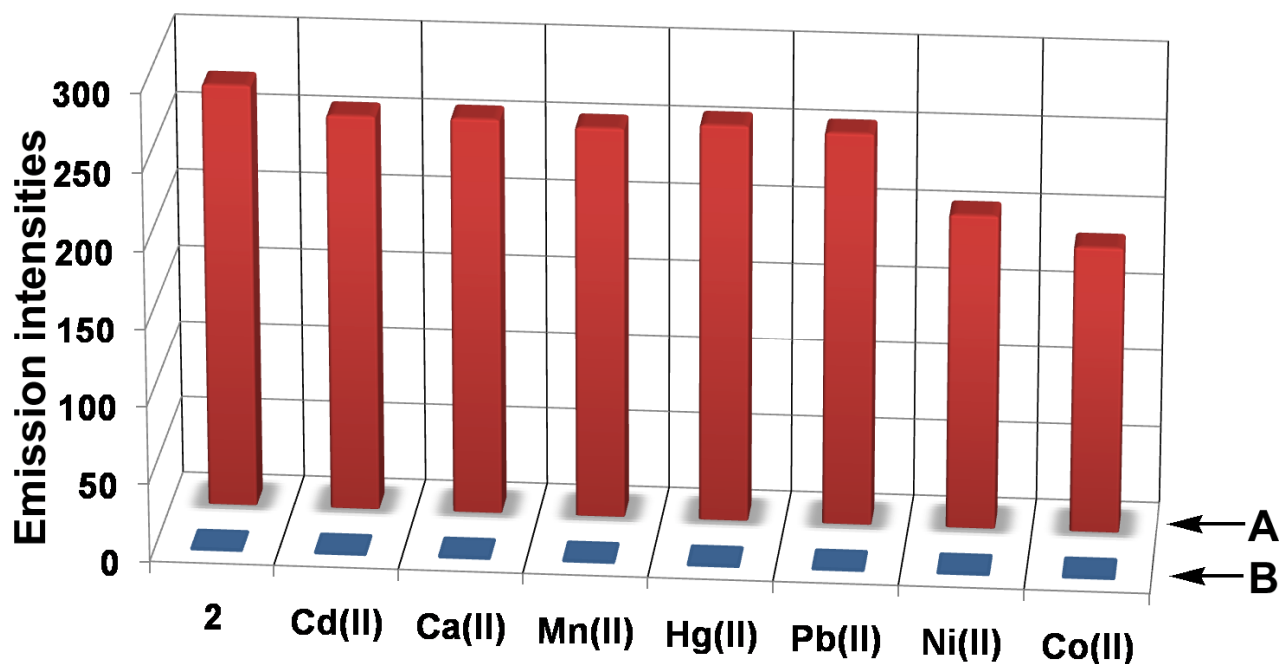

**Figure S15.** (Row A) Emission spectra of **2** (50  $\mu\text{M}$ ) in aqueous buffer solution (pH 7.4, 0.01 M HEPES) with different cations (500  $\mu\text{M}$ ), the bar on far left is only compound **2**. (Row B) Emission spectra of a mixture of **2** (50  $\mu\text{M}$ ) with other metal ions (500  $\mu\text{M}$ ) and with  $\text{Cu}^{2+}$  solution (100  $\mu\text{M}$ )<sup>1</sup>.

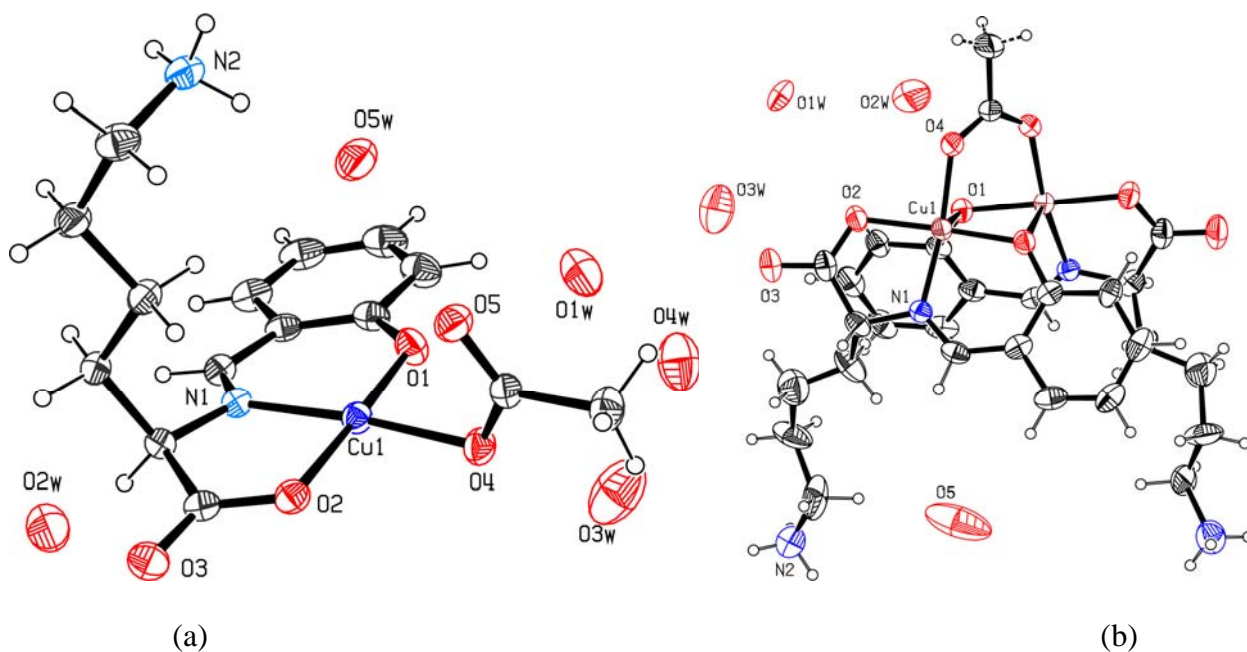

**Figure S16.** Crystal structures of copper acetate and D/L lysine-based schiff base complex obtained from one pot reactions and one pot crystallization methods. (a) Mononuclear purple and (b) dinuclear blue complexes.<sup>3</sup>

## References:

1. S. Khatua, S. H. Choi, J. Lee, J. O. Huh, Y. Do, D. G. Churchill, *Inorg. Chem.* 2009, **48**, 1799-1801.
2. S. Khatua, S. H. Choi, J. Lee, K. Kim, Y. Do, D. G. Churchill, *Inorg. Chem.* 2009, **48**, 2993-2999.
3. S. Khatua, J. Kang, J. O. Huh, C. S. Hong, D. G. Churchill, *Cryst. Growth Des.* 2010, **10**, 327-334.

### END###
